# Supplementary material for: Evaluation of the performance of differently immobilized recombinant lipase B from Candida antarctica preparations for the synthesis of pharmacological derivatives in organic media
Source: Royal Society of Chemistry journal article supplement (doi:10.1039/c5ra22508f), 2016-01-01
Supplement: c5ra22508f1.pdf [file c5ra22508f1.pdf]

## Supporting Information

**Table 1S.** Immobilization parameters of LIPB and CALB on the different supports used in this paper.

| Immobilization on Accurel MP 1000          |                 |                 |                              |                                |
|--------------------------------------------|-----------------|-----------------|------------------------------|--------------------------------|
| Biocatalisador                             | Ua (U/gsupport) | Us (U/gsupport) | Protein offered(mg)/gsupport | Protein adsorved (mg/gsupport) |
| LIPB                                       | 25              | 0.5±0.02        | 2±0.1                        | 0.1±0.1                        |
|                                            | 100             | 5.0±0.1         | 9.5±0.5                      | 1.7±0.5                        |
|                                            | 175             | 15.7±0.1        | 14±0.2                       | 4.0±0.1                        |
|                                            | 350             | 80.5±0.05       | 28±0.5                       | 12±0.05                        |
|                                            | 700             | 175±0.05        | 57±0.5                       | 35±0.2                         |
| CALB                                       | 25              | 1.8±0.1         | 2±0.1                        | 0.1±0.1                        |
|                                            | 100             | 11±0.3          | 9.5±0.1                      | 1.7±0.1                        |
|                                            | 175             | 27±0.3          | 14±0.02                      | 4.2±0.1                        |
|                                            | 350             | 90±0.2          | 28±0.5                       | 12±0.05                        |
|                                            | 700             | 186±0.1         | 57±0.5                       | 35±0.3                         |
| Immobilization on PS-co-DVB/ PS-co-DVB     |                 |                 |                              |                                |
|                                            | Ua (U/gsupport) | Us (U/gsupport) | Protein offered(mg)/gsupport | Protein adsorved (mg/gsupport) |
| LIPB                                       | 25              | 1               | 2±0.1                        | 1±0.1                          |
|                                            | 100             | 4               | 9.5±0.1                      | 4±0.3                          |
|                                            | 175             | 7               | 14±0.02                      | 1.6±0.02                       |
|                                            | 350             | 14              | 28±0.5                       | 14±0.05                        |
|                                            | 700             | 140             | 57±0.5                       | 29±0.1                         |
| CALB                                       | 25              | 0.899           | 2±0.1                        | 0.5±0.05                       |
|                                            | 100             | 5.02            | 9.5±0.1                      | 3.4±0.1                        |
|                                            | 175             | 11.77           | 14±0.02                      | 6.5±0.05                       |
|                                            | 350             | 31.31           | 28±0.5                       | 19±0.1                         |
|                                            | 700             | 300             | 57±0.5                       | 36±0.1                         |
| Immobilization on PMMA-co-DVB/ PMMA-co-DVB |                 |                 |                              |                                |
|                                            | Ua (U/gsupport) | Us (U/gsupport) | Protein offered(mg)/gsupport | Protein adsorved (mg/gsupport) |
| LIPB                                       | 25              | 1.75            | 2±0.1                        | 0.1±0.05                       |
|                                            | 100             | 7               | 9.5±0.1                      | 5±0.3                          |
|                                            | 175             | 21              | 14±0.02                      | 7±0.1                          |
|                                            | 350             | 63              | 28±0.5                       | 18±0.1                         |
|                                            | 700             | 196             | 57±0.5                       | 37±0.1                         |
| CALB                                       | 25              | 5.8             | 2±0.1                        | 1±0.2                          |
|                                            | 100             | 24              | 9.5±0.1                      | 6±0.3                          |
|                                            | 175             | 44              | 14±0.02                      | 10±0.4                         |
|                                            | 350             | 145             | 28±0.5                       | 20±0.05                        |
|                                            | 700             | 401             | 57±0.5                       | 38±0.05                        |
| Immobilization on PMMA/ PMMA               |                 |                 |                              |                                |
| Biocatalisador                             | Ua (U/gsupport) | Us (U/gsupport) | Protein offered(mg)/gsupport | Protein adsorved (mg/gsupport) |
|                                            | 25              | 3.75            | 2±0.1                        | 1±0.3                          |

|      |     |       |         |           |
|------|-----|-------|---------|-----------|
| LIPB | 100 | 17    | 9.5±0.1 | 6±0.05    |
|      | 175 | 29.75 | 14±0.02 | 9±0.2     |
|      | 350 | 87.5  | 28±0.5  | 20±0.1    |
|      | 700 | 210   | 57±0.5  | 37±0.1    |
| CALB | 25  | 1.9   | 2±0.1   | 1±0.3     |
|      | 100 | 36.55 | 9.5±0.1 | 4±0.2     |
|      | 175 | 76    | 14±0.02 | 7±0.05    |
|      | 350 | 153   | 28±0.5  | 19.5±0.05 |
|      | 700 | 368   | 57±0.5  | 33±0.05   |

\* $U_a$  is the total units of enzyme added in the beginning of the immobilization process (U/g of support);

$U_s$  is the units of enzyme that are not adsorbed on the support and that are removed in the first washes (U/g of support);  $U_{imo}$  is the actual units of enzyme immobilized (U/g of support); protein offered-Protein in initial immobilization ( $mg/g_{support}^{initial} - mg/g_{support}^{final}$ ); immobilization time: 24 h

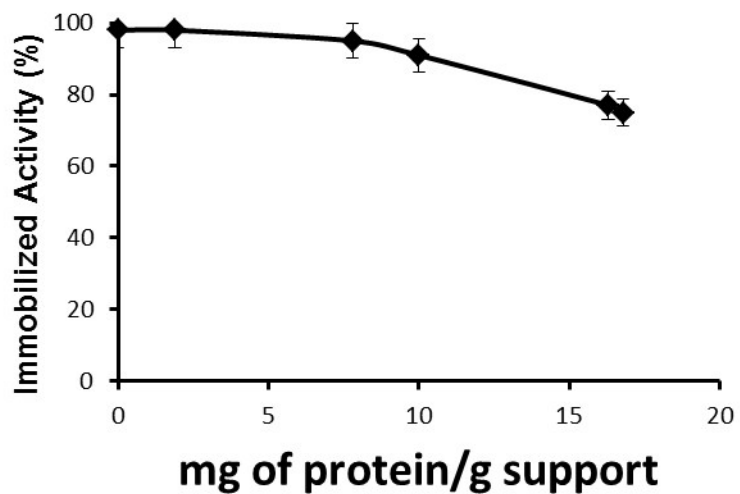

**Figure 1S. Loading Capacity of LIPB lipase on Accurel MP 1000 support. Experiments were performed as described in Section 2.2.10.**

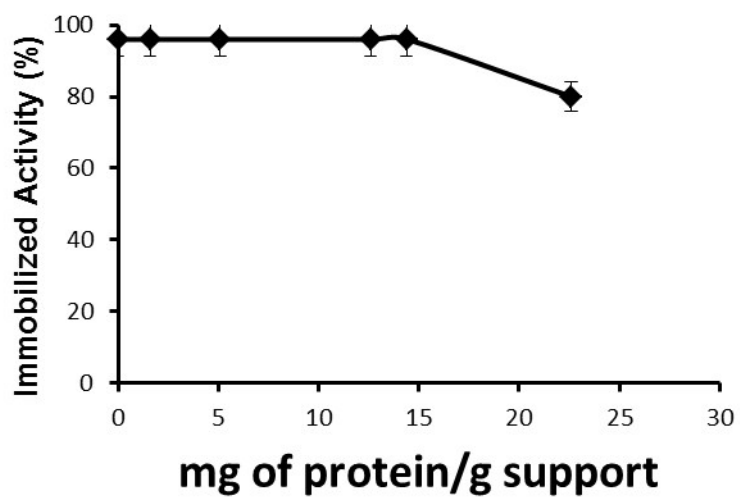

**Figure 2S. Loading Capacity of LIPB lipase on PS-co-DVB/ PS-co-DVB support. Experiments were performed as described in Section 2.2.10.**

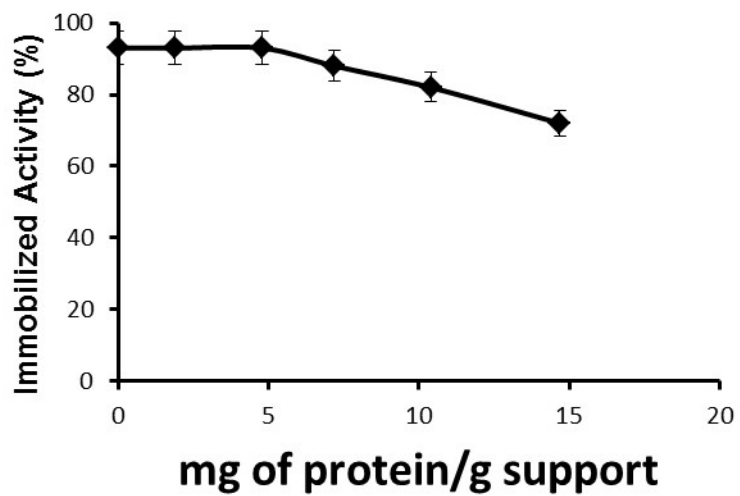

**Figure 3S. Loading Capacity of LIPB lipase on PMMA-co-DVB/PMMA-co-DVB support. Experiments were performed as described in Section 2.2.10.**

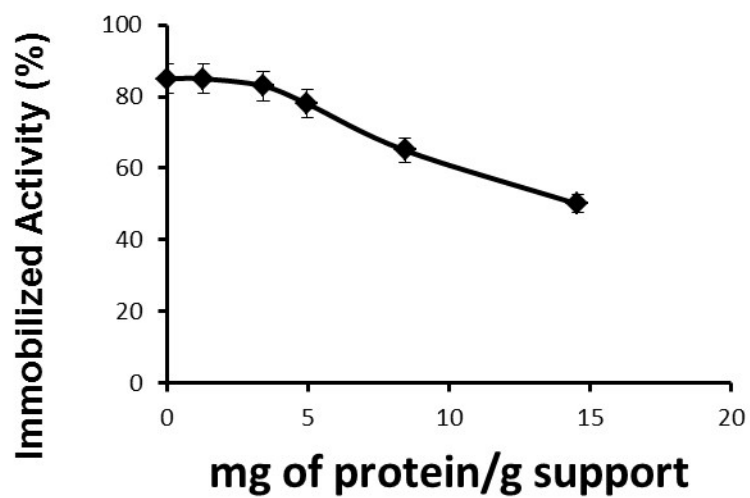

**Figure 4S. Loading Capacity of LIPB lipase on PMMA/PMMA support. Experiments were performed as described in Section 2.2.10.**

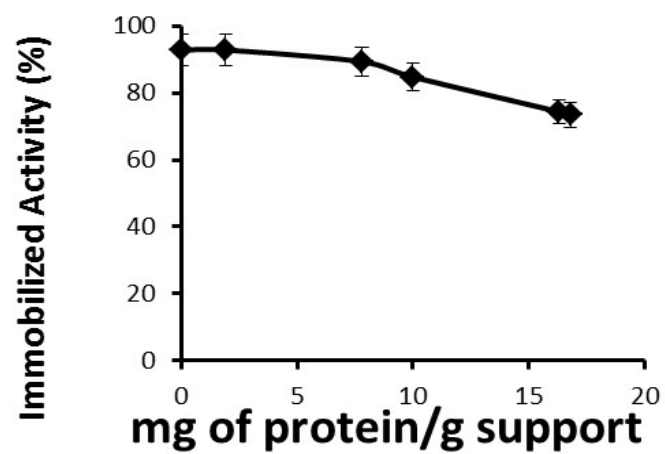

**Figure 5S. Loading Capacity of CALB lipase on Accurel MP 1000 support. Experiments were performed as described in Section 2.2.10.**

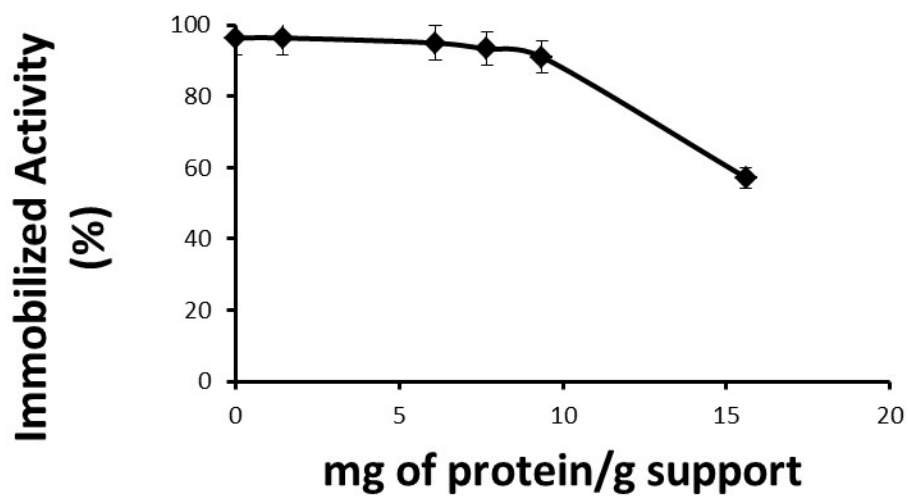

**Figure 6S. Loading Capacity of CALB lipase on PS-co-DVB/ PS-co-DVB support. Experiments were performed as described in Section 2.2.10.**



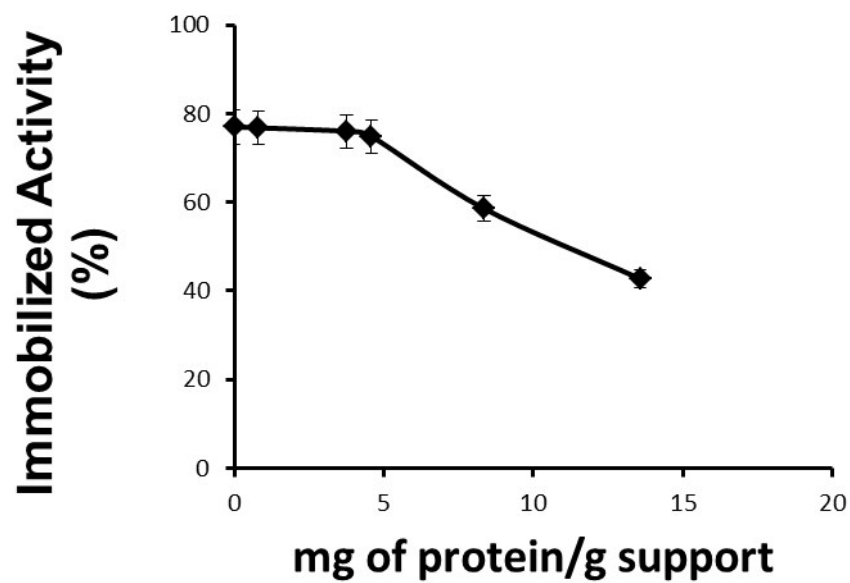

**Figure 7S. Loading Capacity of CALB lipase on PMMA-co-DVB/PMMA-co-DVB support. Experiments were performed as described in Section 2.2.10.**

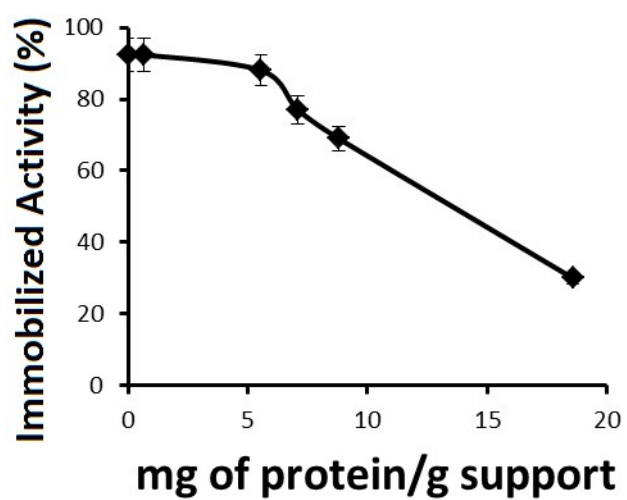

**Figure 8S. Loading Capacity of CALB lipase on PMMA/PMMA support. Experiments were performed as described in Section 2.2.10.**
